# Supplementary material for: Cell cycle arrest induces lipid droplet formation and confers ferroptosis resistance
Source: PubMed Central journal article supplement (PMC10761718; doi:10.1038/s41467-023-44412-7), 2024-01-02
Supplement: 41467_2023_44412_MOESM1_ESM.pdf [file 41467_2023_44412_MOESM1_ESM.pdf]

## **Supplementary Information**

**Cell-cycle arrest induces lipid droplet formation and confers ferroptosis resistance**

### **Table of contents**

Supplementary Figure 1-6  
Supplementary Table 1

## Supplementary Figures

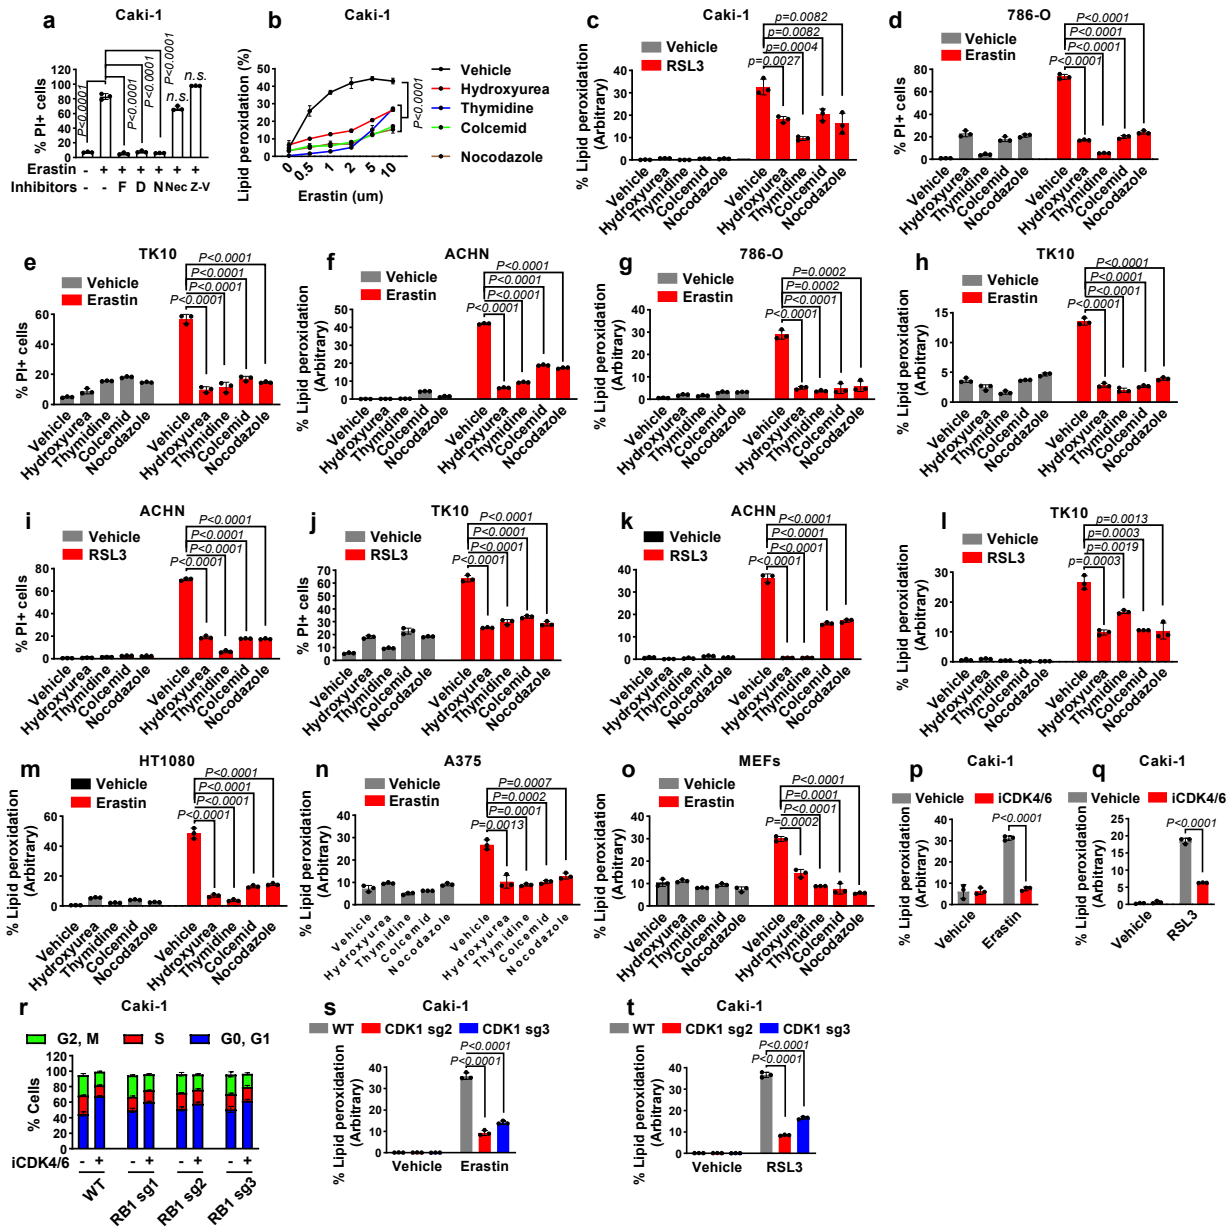

**Supplementary Fig. 1. Cell-cycle arrest drives resistance to ferroptosis. a**, Populations of PI-positive Caki-1 cells after treatment with 2  $\mu$ M erastin and cell death inhibitors for 24 h. *n.s.*, not significant; F, 1  $\mu$ M ferrostatin-1; D, 100  $\mu$ M DFO; N, 5 mM *N*-acetylcysteine; Nec, 2  $\mu$ M necrostatin-1s; Z-V, 20  $\mu$ M Z-VAD-FMK. **b and c**, Lipid peroxidation measurement in Caki-1

cells after 24 h of pretreatment with cell-cycle inhibitors followed by treatment with 0-10  $\mu$ M erastin for 8 h (**b**) or 25 nM RSL3 for 16 h (**c**). **d and e**, PI-positive 786-O (**d**) and TK10 (**e**) cell populations after 24 h pretreatment with cell-cycle inhibitors followed by 10  $\mu$ M erastin for 24 h. **f-h**, Lipid peroxidation measurement in cells after 24 h pretreated with cell-cycle inhibitors followed by erastin for 18 h. Erastin, 2  $\mu$ M in ACHN (**f**), 5  $\mu$ M in 786-O (**g**), and 5  $\mu$ M in TK10 (**h**). **i and j**, PI-positive populations of ACHN cells treated with 500 nM RSL3 for 24 h (**i**) and TK10 cells treated with 75 nM RSL3 for 24 h (**j**). **k-o**, Lipid peroxidation measurement in ACHN cells treated with 100 nM RSL3 for 18 h (**k**), TK10 cells treated with 30 nM RSL3 for 18 h (**l**), HT1080 cells treated with 5  $\mu$ M erastin for 18 h (**m**), A375 cells treated with 10  $\mu$ M erastin for 18 h (**n**), and MEFs treated with 2  $\mu$ M erastin for 8 h (**o**). **p and q**, Lipid peroxidation measurement in Caki-1 cells treated with iCDK4/6 and 2  $\mu$ M erastin for 8 h (**p**) or 25 nM RSL3 for 16 h (**q**). **r**, Cell-cycle profiles for WT and RB1 sgRNA-infected Caki-1 cells. **s and t**, Lipid peroxidation measurement in WT, CDK1 sg2, and CDK1 sg3 Caki-1 cells treated with 2  $\mu$ M erastin for 8 h (**s**) or 25 nM RSL3 for 16 h (**t**). Mean ( $\pm$  SD) values are shown.  $n = 3$ .  $n$  indicates independent repeats,  $P$  values were calculated using two-way ANOVA (**b**) or an unpaired, two-tailed  $t$ -test. Source data are provided as a Source Data file.

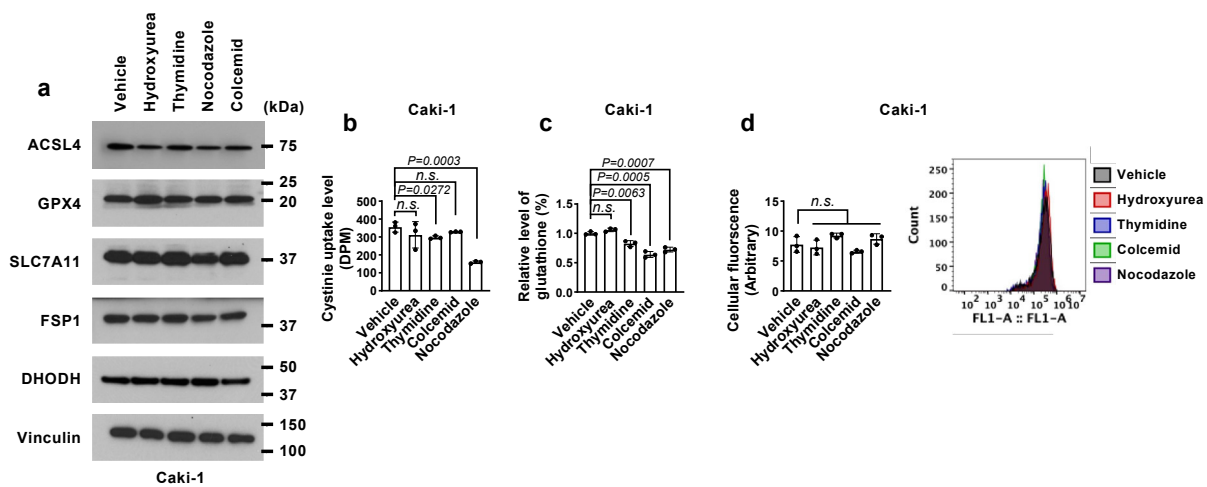

**Supplementary Fig. 2. Cell-cycle arrest does not alter biochemical or genetic hallmarks of ferroptosis.** **a**, Immunoblot of the expression of ACSL4, GPX4, SLC7A11, FSP1, and DHODH in Caki-1 cells treated with a vehicle, hydroxyurea, thymidine, nocodazole, or colcemid for 48 h. **b**, Measurement of cystine uptake in Caki-1 cells treated with the indicated vehicle or cell-cycle inhibitors. **c**, Glutathione measurement in Caki-1 cells treated with a vehicle or cell-cycle inhibitors. **d**, Bar graph and histogram showing the levels of intracellular labile iron in Caki-1 cells. Mean ( $\pm$  SD) values are shown.  $n = 3$ .  $n$  indicates independent repeats (an unpaired, two-tailed  $t$ -test). n. s. not significant. Source data are provided as a Source Data file.

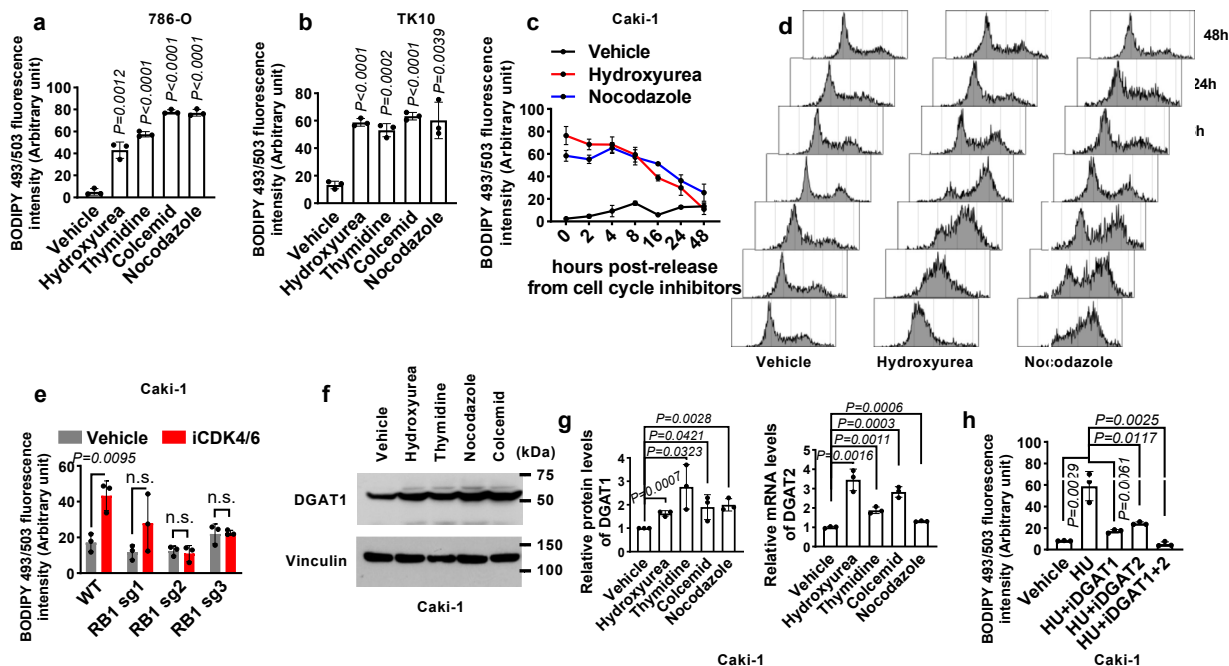

**Supplementary Fig. 3. Cell-cycle arrest induces lipid droplet accumulation.** **a and b**, The relative intensities of BODIPY 493/503 staining in 786-O (**a**) and TK10 (**b**) cells treated with cell-cycle inhibitors for 48 h. **c and d**, Caki-1 cells were treated with either vehicle, hydroxyurea or nocodazole for 24 h and then released for the indicated time points. BODIPY 493/503 staining was used to assess changes in lipid droplet accumulation over time after released from cell cycle inhibitors (**c**) and PI-staining was used to analyze the cell cycle (**d**). **e**, The relative intensities of BODIPY 493/503 staining in WT and RB1 sgRNA (sg1, sg2, and sg3)-infected Caki-1 cells treated with and without 2  $\mu$ M iCDK4/6 for 48 h. **f**, Representative immunoblot of DGAT1 expression in Caki-1 cells treated with cell-cycle inhibitors for 48 h and the average relative DGAT1 protein levels normalized to vinculin protein levels from three independent experiments. **g**, The relative DGAT2 expression levels in Caki-1 cells treated with cell-cycle inhibitors for 48 h. **h**, The relative intensities of BODIPY 493/503 staining in Caki-1 cells given the indicated treatments for 48 h. HU, hydroxyurea (0.3 mM). Mean ( $\pm$  SD) values are shown.  $n = 3$ .  $n$  indicates

independent repeats (an unpaired, two-tailed  $t$ -test). n. s. not significant. Source data are provided as a Source Data file.

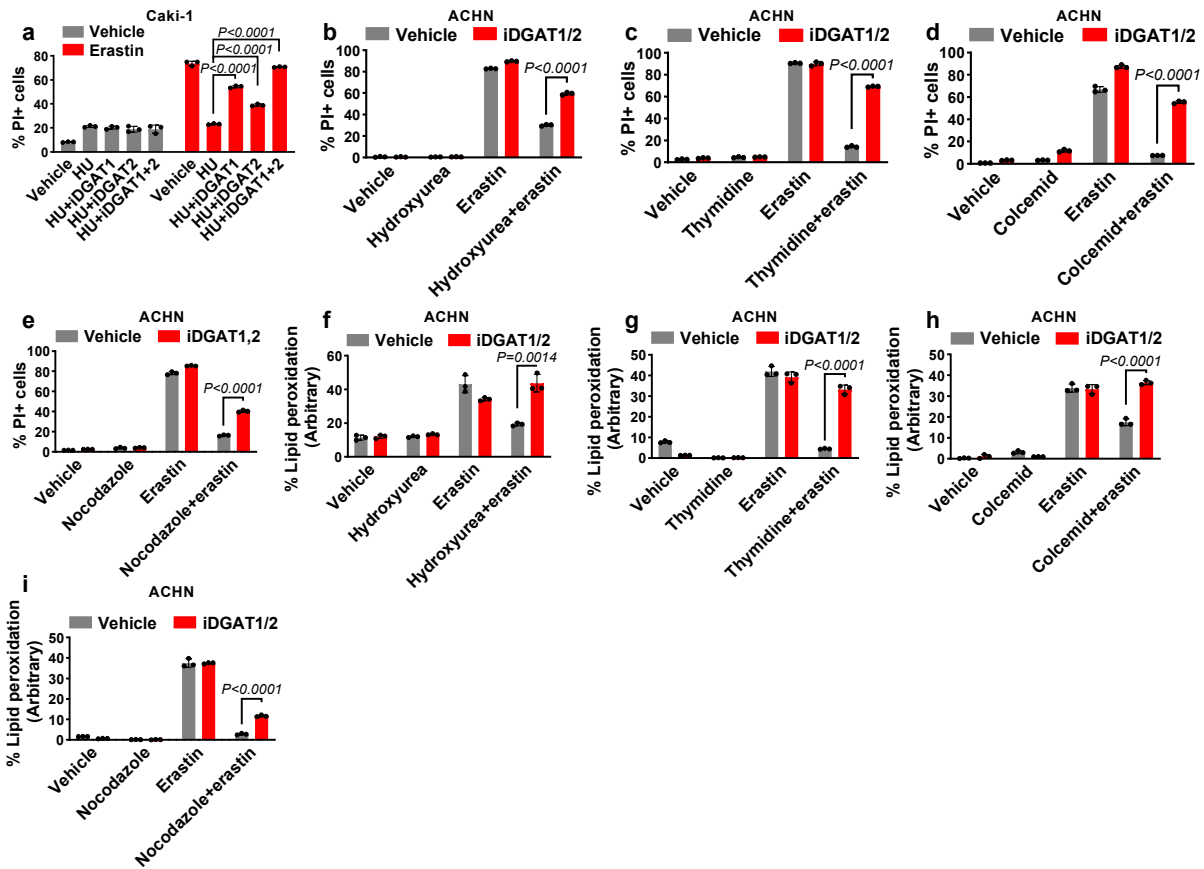

**Supplementary Fig. 4. Triglycerides protects cells from ferroptosis.** **a**, Populations of PI-positive Caki-1 cells pretreated with hydroxyurea together with the indicated DGAT inhibitors followed by 2  $\mu$ M erastin for 18 h. **b-e**, Populations of PI-positive ACHN cells treated with 5  $\mu$ M erastin for 24 h. Cells were pretreated with a vehicle or iDGAT1/2 for 24 h with 0.5 mM hydroxyurea (**b**), 2.5 mM thymidine (**c**), 0.035  $\mu$ g/ml colcemid (**d**), or 200 nM nocodazole (**e**) for 24 h. **f-i**, Lipid peroxidation measurement in ACHN cells treated with 2  $\mu$ M erastin for 18 h. Cells were pretreated with a vehicle or iDGAT1/2 together with 0.5 mM hydroxyurea (**g**), 2.5 mM thymidine (**g**), 0.035  $\mu$ g/ml colcemid (**h**), or 200 nM nocodazole (**i**) for 24 h. Mean ( $\pm$  SD) values are shown.  $n = 3$ .  $n$  indicates independent repeats (two-tailed  $t$ -test). Source data are provided as a Source Data file.

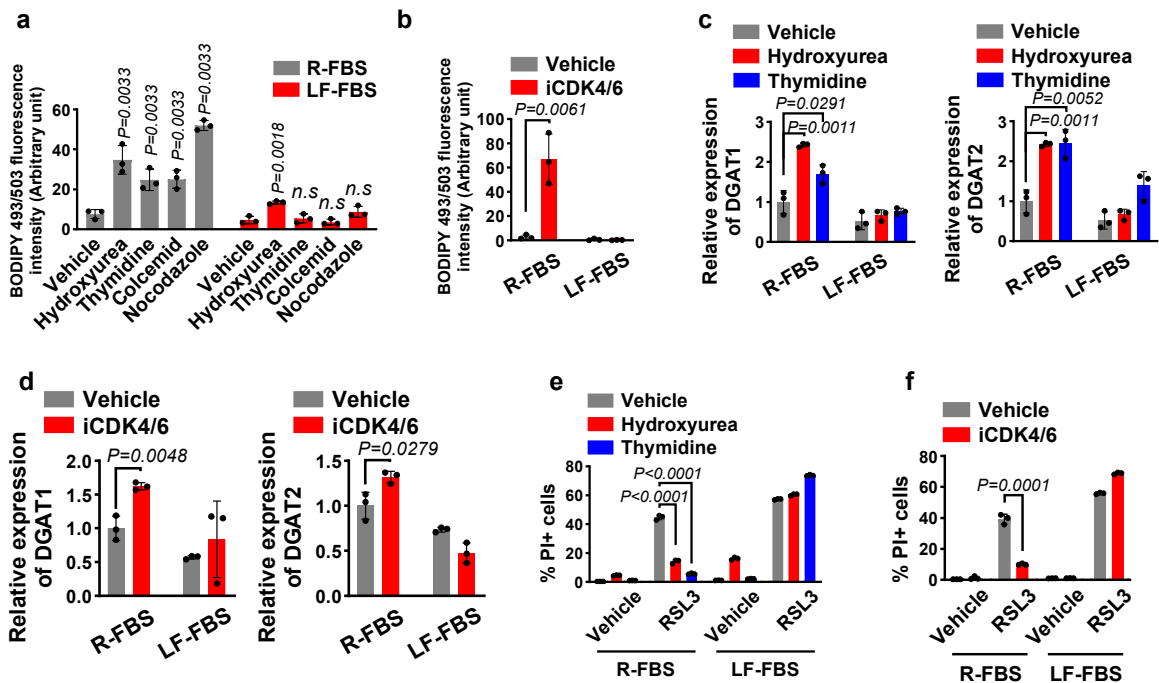

**Supplementary Fig. 5. Ferroptosis resistance in cell cycle-arrested cells largely abolished with lipoprotein-free fetal bovine serum. a and b,** The relative intensities of BODIPY 493/503 staining in Caki-1 cells. Cells were cultured with either regular-fetal bovine serum (R-FBS) or lipoprotein-free fetal bovine serum (LF-FBS) and treated with cell-cycle inhibitors for 30 h. **c and d,** The relative DGAT1 and DGAT2 expression levels in Caki-1 cells cultured with the indicated fetal bovine serum and treated with cell-cycle inhibitors for 30 h. **e and f,** Quantification of PI-positive dead Caki-1 cells using flow cytometry after 8 h of pretreatment with the indicated fetal bovine serum and cell cycle inhibitors for 8 h, followed by treatment with 50 nM RSL3 for 16h. Mean ( $\pm$  SD) values are shown.  $n = 3$ .  $n$  indicates independent repeats (unpaired, two-tailed  $t$ -test).  $n. s.$  not significant. Source data are provided as a Source Data file.



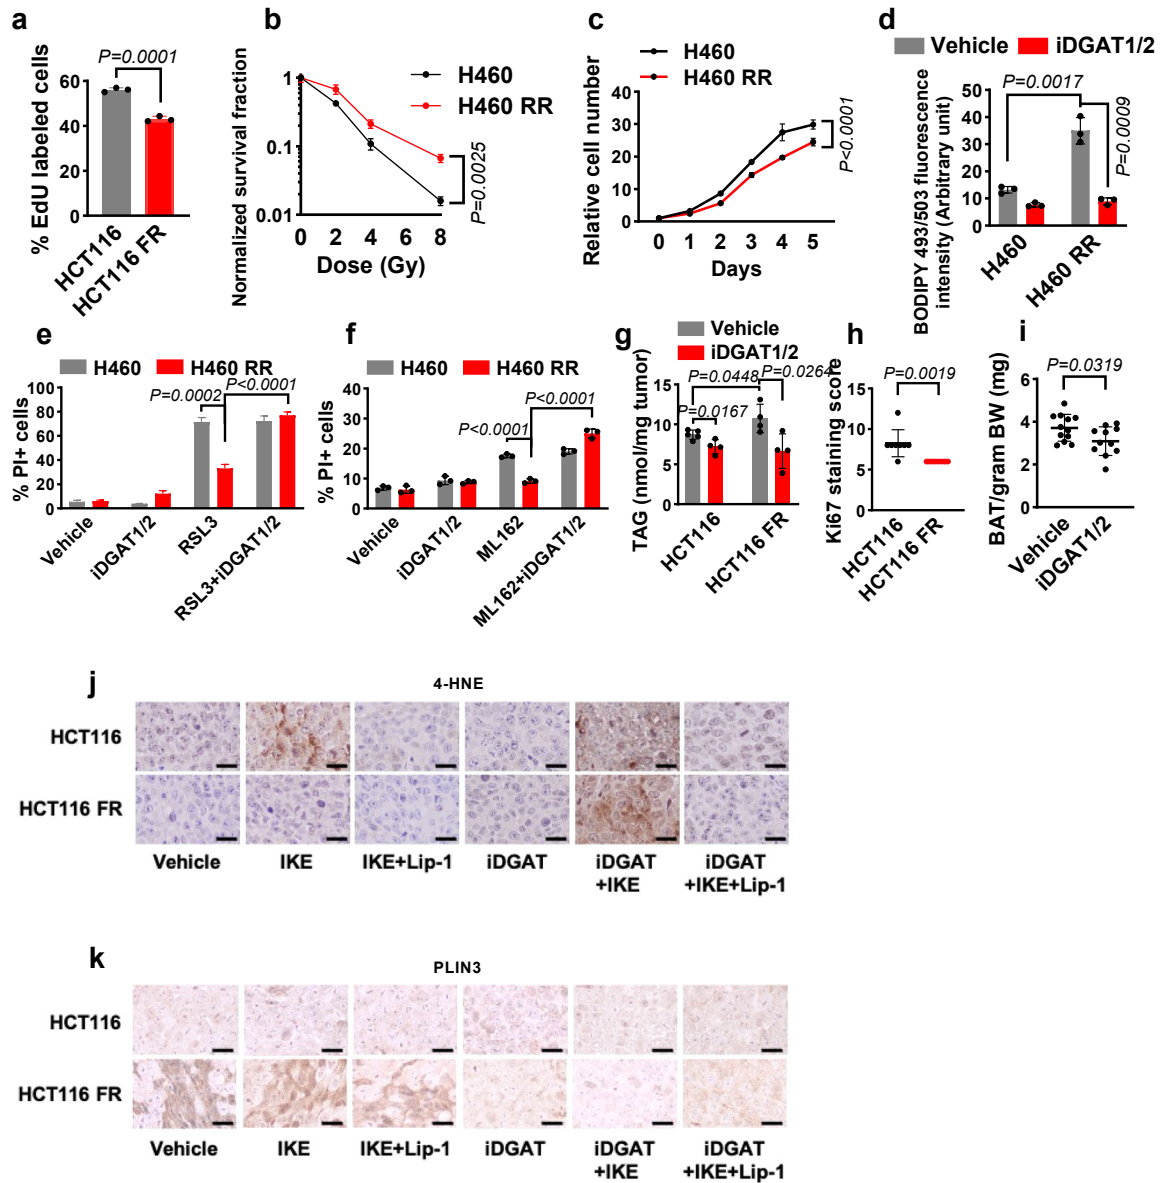

**Supplementary Fig. 6. Treatment of slow-cycling therapy-resistant cells.** **a**, Populations of EdU-positive labeled HCT116 and HCT116 FR cells measured using flow cytometry after a 1-h EdU pulse. **b**, Clonogenic survival curves for H460 and H460 RR cells exposed to radiation at different doses. Cell colonies were counted after 2 weeks of ionizing radiation exposure, and the numbers of survival fraction were normalized to those of unirradiated control cells. **c**, H460 and H460 RR cell growth measured for 5 days. **d**, The relative intensities of BODIPY 493/503 staining

in H460 and H460 RR cells treated with iDGAT1/2 for 48 h. **e and f**, The population of PI-positive cells treated with 10  $\mu$ M RSL3 and iDGAT1/2 (**e**) and 5  $\mu$ M ML162 and iDGAT1/2 (**f**) for 20 h. **g**, Triglyceride (TAG) levels measured in tumors from xenograft models with the indicated treatments.  $n = 4$ , except HCT116 vehicle ( $n = 5$ ). **h**, Immunochemical scoring of Ki-67 staining in HCT116 and HCT116 FR xenograft tumors treated with a vehicle.  $n = 8$  tumors. **i**, The weights of brown adipose tissues normalized to mouse body weight in vehicle- and iDGAT1/2-treated mice.  $n = 12$  (vehicle),  $n = 11$  (iDGAT1/2) mice. Mean ( $\pm$  SD) values are shown. **j and k**, Representative images of 4-HNE (**j**) and PLIN3 (**k**) staining of HCT116 and HCT116 FR xenograft tumors with the indicated treatments. Scale bars, 20  $\mu$ m. Mean ( $\pm$  SD) values are shown.  $n = 3$ .  $n$  indicates independent repeats, except g, h, and i. unpaired, two-tailed  $t$ -test.  $P$  values were calculated using two-way ANOVA (**b and c**) or an unpaired, two-tailed  $t$ -test. Source data are provided as a Source Data file.

## Supplementary Table

**Supplementary Table 1. Cell-cycle inhibitor treatment conditions**

| Cell line | Cell number<br>12-well plate | Hydroxyurea<br>(mM) | Thymidine<br>(mM) | Colcemid<br>( $\mu\text{g/ml}$ ) | Nocodazole<br>(nM) | Erastin<br>( $\mu\text{M}$ , hours;<br>for cell death) | Erastin<br>( $\mu\text{M}$ , hours;<br>for lipid<br>peroxidation) |
|-----------|------------------------------|---------------------|-------------------|----------------------------------|--------------------|--------------------------------------------------------|-------------------------------------------------------------------|
| Caki-1    | $9.0 \times 10^4$            | 0.3                 | 1                 | 0.035                            | 200                | 2, 18                                                  | 2, 8                                                              |
| ACHN      | $1.5 \times 10^5$            | 0.5                 | 2.5               | 0.035                            | 200                | 5, 24                                                  | 2, 18                                                             |
| HT1080    | $1.0 \times 10^5$            | 0.5                 | 2                 | 0.020                            | 100                | 10, 24                                                 | 5, 18                                                             |
| A375      | $1.0 \times 10^5$            | 0.5                 | 2                 | 0.035                            | 200                | 20, 24                                                 | 10, 18                                                            |
| MEFs      | $8.0 \times 10^4$            | 0.1                 | 2                 | 0.035                            | 200                | 2, 16                                                  | 2, 8                                                              |
| 786-O     | $1.0 \times 10^5$            | 0.5                 | 2                 | 0.035                            | 200                | 10, 24                                                 | 5, 18                                                             |
| TK10      | $1.0 \times 10^5$            | 0.5                 | 2                 | 0.035                            | 200                | 10, 24                                                 | 5, 18                                                             |
